# Supplementary material for: Institutional differences in USMLE Step 1 and 2 CK performance: Cross-sectional study of 89 US allopathic medical schools
Source: PLoS One. 2019 Nov 4;14(11):e0224675. doi: 10.1371/journal.pone.0224675 (PMC6827894; doi:10.1371/journal.pone.0224675)
Supplement: S1 Table — (XLSX) [file pone.0224675.s001.xlsx]

## Sheet: Burk-Rafel Supporting Info
	S1 Table. Average GPA, MCAT, and USMLE Step 1 and 2 CK for 89 US allopathic medical schools reporting complete data from 2012-2014, with associated national averages
	Institution	Undergraduate GPA		MCAT		USMLE Step 1		USMLE Step 2 CK
		Average		Average total score		Examinee count	Average score	Examinee count	Average score
		2008-2010	2010-2012	2008-2010	2010-2012	2012-2014	2012-2014	2012-2014	2012-2014
	Baylor College of Medicine	3.83	3.81333	34	34.1	517	241	550	244.333
	Boston University	3.67333	3.65	31.8	33	520	231.667	558	239.667
	Brown University (Alpert)	3.64333	3.67667	33.6	32.9	293	229.333	299	239
	Case Western Reserve University	3.68	3.7	34.7	34.9	599	233.333	579	235.667
	Columbia University	3.79	3.78	35.7	35.7	344	239	486	243
	Cornell University (Weill)	3.77	3.77667	34.8	34.7	300	235.667	298	243.333
	Creighton University	3.68	3.68	29.7	29.7	417	221	368	236.667
	Dartmouth College (Geisel)	3.74333	3.72667	33.2	33	259	235.667	245	242.667
	Drexel University	3.57	3.57	30.3	30.3	784	228	884	236.333
	Duke University	3.76667	3.78	34.7	34.9	322	237	305	230.333
	East Tennessee State University (Quillen)	3.68	3.68667	27.6	27.9	205	220.667	180	235
	Eastern Virginia Medical School	3.53	3.53	30.9	30.75	374	230.667	340	236
	Emory University	3.66667	3.67	33.8	34.1	411	231	424	250
	Florida State University	3.64	3.64	27.3	27.3	350	222	350	235.667
	George Washington University	3.69	3.7	30.6	30.6	507	229	509	234
	Georgetown University	3.62333	3.60333	31.5	31.1	596	230.333	579	237.333
	Georgia Regents University	3.7	3.7	30.6	30.6	635	229.667	587	239
	Harvard University	3.85667	3.87	35.8	36	516	239.333	512	248
	Icahn School of Medicine at Mount Sinai	3.68667	3.73333	35	35.6	414	234	415	243.333
	Indiana University—​Indianapolis	3.73	3.71333	30.7	30.5	946	229.667	919	237.333
	Johns Hopkins University	3.85333	3.85667	35.6	35.4	349	236.667	331	241
	Marshall University (Edwards)	3.5	3.5	29.1	29.1	213	221	209	230
	Mayo Medical School	3.71	3.75667	32.7	32.6	148	233	139	239.333
	Medical University of South Carolina	3.615	3.65	29.7	29.9	484	223	458	234
	Michigan State University (College of Human Medicine)	3.56667	3.58	29.2	28.5	570	226.667	422	236
	New York Medical College	3.6	3.6	31.2	31.2	580	229.667	589	236.333
	New York University	3.75667	3.77667	33.2	33.5	337	233	533	243.333
	Northwestern University (Feinberg)	3.77333	3.77333	34.7	34.5	501	237	500	245
	Ohio State University	3.72	3.67333	33.3	33.6	683	230	623	244
	Oregon Health and Science University	3.64667	3.64333	30.6	31.1	361	228.667	372	231.667
	Rush University	3.64	3.64	30.9	30.9	407	223.667	438	235.333
	Rutgers Biomedical and Health Sciences	3.63	3.63	30.9	30.9	464	230.333	452	239
	St. Louis University	3.71	3.71	32.7	32.7	531	227.333	504	234.667
	Stanford University	3.75333	3.77333	34.3	34.8	254	237.333	293	235.667
	Stony Brook University—​SUNY	3.625	3.65667	32.1	32.1	371	234.667	360	237
	Temple University	3.67	3.66333	31.2	31.3	569	228.333	606	234.667
	Texas A&M Health Science Center	3.65	3.65	28.8	28.8	493	223	359	236.333
	Thomas Jefferson University (Kimmel)	3.67	3.67667	31.8	32	773	229.333	757	236.333
	Uniformed Services University of the Health Sciences (Hebert)	3.54	3.54	31.2	31.2	504	220.333	481	228
	University of Alabama—​Birmingham	3.74	3.74667	30.3	30.2	518	226	507	228.333
	University of Arizona	3.69	3.695	29.7	30.15	345	224	330	233.333
	University of California—​Davis	3.58667	3.58667	30.9	30.9	297	222	342	239
	University of California—​Irvine	3.66667	3.68667	31.9	31.9	311	230.667	305	233.333
	University of California—​Los Angeles (Geffen)	3.79667	3.78	34.5	34.4	512	233.333	484	242.333
	University of California—​San Diego	3.75667	3.72667	33.2	33.3	364	231.333	379	236.667
	University of California—​San Francisco	3.72	3.75667	34.3	34.4	500	229.667	527	237.333
	University of Chicago (Pritzker)	3.81	3.81667	35.8	36.1	261	239.333	299	245.333
	University of Cincinnati	3.59	3.65333	32.2	32	491	230	467	238.333
	University of Colorado	3.68333	3.69333	32.2	32.1	472	228.333	474	240.667
	University of Connecticut	3.6925	3.69583	31.3	31.7	264	230.333	236	234.667
	University of Florida	3.74667	3.76	31.8	31.7	409	231	387	242.333
	University of Hawaii—​Manoa (Burns)	3.61667	3.625	29.2	30	182	233.667	181	236
	University of Illinois	3.58	3.585	30.6	30.6	937	223.667	900	233.667
	University of Iowa (Carver)	3.72	3.75667	31.7	32.1	432	232	417	238.333
	University of Kansas Medical Center	3.69	3.64	29.1	28.9	536	221	498	233
	University of Kentucky	3.74	3.70667	30.9	31.1	344	225.667	424	237
	University of Louisville	3.65	3.65	30	30	471	227.333	470	235.333
	University of Maryland	3.70667	3.72333	31.3	31.4	478	225	465	238.333
	University of Massachusetts—​Worcester	3.65667	3.67667	32.1	32.2	362	232	349	235.667
	University of Miami (Miller)	3.69333	3.72	31.8	31.8	543	228	469	239
	University of Michigan—​Ann Arbor	3.75333	3.77667	35	34.9	513	233.667	505	248
	University of Missouri	3.76	3.76667	30.6	30.5	296	236.333	278	244
	University of Nebraska Medical Center	3.715	3.75	29.3	30.2	373	224	353	239
	University of New Mexico	3.59	3.61	27.6	27.3	254	216.667	223	235
	University of North Carolina—​Chapel Hill	3.62667	3.63	32.4	32.4	490	230.667	482	244.333
	University of Oklahoma	3.74	3.74	30	30	483	226.667	432	235.333
	University of Pennsylvania (Perelman)	3.80333	3.81333	35.8	36.8	483	243	455	248.667
	University of Rochester	3.68333	3.73333	32.2	32.8	303	234.667	310	234.667
	University of South Dakota (Sanford)	3.8	3.8	29.4	29.4	157	227	152	236.333
	University of South Florida	3.7	3.7	30.3	30.3	348	222	450	242.667
	University of Southern California (Keck)	3.60667	3.63333	32.7	33.4	521	235	500	236
	University of Tennessee Health Science Center	3.68	3.66667	30	30	474	222	445	236.333
	University of Texas Health Science Center—​Houston	3.74	3.74667	31	31	693	233.667	685	237.333
	University of Texas Southwestern Medical Center	3.80333	3.81333	33.3	33.6	697	234.667	656	241.333
	University of Toledo	3.7	3.7	30.9	30.9	504	227.333	498	238.333
	University of Utah	3.64	3.65667	28.7	29	236	227	249	230
	University of Vermont	3.68667	3.67667	30.1	30.4	325	223.667	358	238.667
	University of Virginia	3.75	3.77667	33.9	34.4	452	232.667	449	248.333
	University of Washington	3.67333	3.68333	31	31	655	226.333	629	236.667
	University of Wisconsin—​Madison	3.71667	3.70667	31.3	31.1	499	228.333	465	237.333
	Vanderbilt University	3.8	3.79333	34.2	34.8	319	234.667	312	243
	Virginia Commonwealth University	3.63	3.63	29.4	29.4	588	225	560	237.333
	Wake Forest University	3.61667	3.57667	31.1	31.9	355	226	374	243
	Washington University in St. Louis	3.86333	3.86	37.3	37.2	366	240	364	248.333
	Wayne State University	3.72	3.72	30.3	30.3	859	225.667	884	235
	West Virginia University	3.73667	3.74333	28.9	28.4	294	225.667	300	238.333
	Wright State University (Boonshoft)	3.68	3.68	30.3	30.3	298	226.333	287	235.333
	Yale University	3.8	3.79667	35.8	36.2	303	238	308	239.333
	Yeshiva University (Einstein)	3.71	3.73333	32	32.5	547	229	566	239
	Summary Data	Undergraduate GPA		MCAT		USMLE Step 1		USMLE Step 2 CK
		Overall average		Overall average		Total examinees	Pooled average	Total examinees	Pooled average
		2008-2010	2010-2012	2008-2010	2010-2012	2012-2014	2012-2014	2012-2014	2012-2014
	All 89 Institutions in Study	3.6948	3.7005	31.7876	31.9	39615	229.545	39252	238.349
	All Allopathic Matriculants/Examinees	3.66333	3.67333	30.9333	31.1333	60273	228	57903	238.333
	Data Sources
	Institutional Data	1. Best Medical Schools: Research. US News and World Report. 2008-2016 editions, online and print. Subscription required. 2. Medical School Admission Requirements. Association of American Medical Colleges. Washington, DC. 2008-2012 editions.
	National Allopathic GPA and MCAT Data	AAMC FACTS Table 17, 2013 edition
	National USMLE Examinee Counts	USMLE Performance Data available from https://www.usmle.org/performance-data/
	National USMLE Averages	USMLE Score Interpretation Guidelines, 2015 edition
